# Supplementary material for: Rational Design, Synthesis and Evaluation of γ-CD-Containing Cross-Linked Polyvinyl Alcohol Hydrogel as a Prednisone Delivery Platform
Source: PubMed Central journal article supplement (PMC5874843; doi:10.3390/pharmaceutics10010030), 2018-03-07
Supplement: pharmaceutics-10-00030-s001.pdf [file pharmaceutics-10-00030-s001.pdf]

# Supplementary Materials: Rational Design, Synthesis and Evaluation of $\gamma$ -CD-Containing Cross-Linked Polyvinyl Alcohol Hydrogel as a Prednisone Delivery Platform

Adolfo Marican, Fabián Avila-Salas, Oscar Valdés, Sergio Wehinger, Jorge Villaseñor, Natalia Fuentealba, Mauricio Arenas-Salinas, Yerko Argandoña, Verónica Carrasco-Sánchez and Esteban F. Durán-Lara

**Table S1.** List of dicarboxylic acids evaluated as crosslinking agents in different PVA hydrogels

| Id. | Crosslinking agent  | Structure                                                                            | References  |
|-----|---------------------|--------------------------------------------------------------------------------------|-------------|
| 1   | Oxalic acid         | 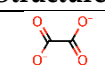   | 23          |
| 2   | Malonic acid        |    | 23-25       |
| 3   | Succinic acid       |    | 23,24,26,27 |
| 4   | DL-Malic acid       |    | 28          |
| 5   | Fumaric acid        |   | 23,24       |
| 6   | Maleic acid         |  | 23,24       |
| 7   | Citraconic acid     |  | 24          |
| 8   | Itaconic acid       |  | 24          |
| 9   | L-(+)-Tartaric acid |  | 23          |
| 10  | Glutaric acid       |  | 24,27,29,30 |
| 11  | Adipic acid         |  | 23,24,27,29 |
| 12  | Pimelic acid        |  | 30          |
| 13  | Suberic acid        |  | 30          |
| 14  | Azelaic acid        |  | 31          |
| 15  | Phthalic acid       |  | 24, 32      |
| 16  | Isophthalic acid    |  | 24          |
| 17  | Terephthalic acid   |  | 23,24,32    |

|    |                           |                                                                                    |        |
|----|---------------------------|------------------------------------------------------------------------------------|--------|
| 18 | 2,5-pyridine dicarboxylic | 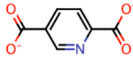 | 23     |
| 19 | L-Aspartic acid           |  | 33     |
| 20 | L-Glutamic acid           |  | 26, 33 |

**Table S2.** Swelling experiments to determinate the influence of CD composition, pH and time. Numbers in parentheses indicate coded values.

| Experiment | CD Composition [%] | pH     | Time [h]        | Swelling [%] |
|------------|--------------------|--------|-----------------|--------------|
| 1          | 2.44 (-1)          | 4 (-1) | 0 (-1)          | 0.0          |
| 2          | 2.44 (-1)          | 4 (-1) | 1 (-0.957447)   | 132.0        |
| 3          | 2.44 (-1)          | 4 (-1) | 2 (-0.914894)   | 115.6        |
| 4          | 2.44 (-1)          | 4 (-1) | 3 (-0.872340)   | 219.7        |
| 5          | 2.44 (-1)          | 4 (-1) | 4 (-0.829787)   | 189.3        |
| 6          | 2.44 (-1)          | 4 (-1) | 5 (-0.787234)   | 215.6        |
| 7          | 2.44 (-1)          | 4 (-1) | 6 (-0.744681)   | 198.4        |
| 8          | 2.44 (-1)          | 4 (-1) | 7 (-0.702128)   | 184.4        |
| 9          | 2.44 (-1)          | 4 (-1) | 24 (0.021277)   | 233.6        |
| 10         | 2.44 (-1)          | 4 (-1) | 47 (1)          | 167.2        |
| 11         | 2.44 (-1)          | 7 (0)  | 0 (-1)          | 0.0          |
| 12         | 2.44 (-1)          | 7 (0)  | 0.1 (-0.996454) | 66.7         |
| 13         | 2.44 (-1)          | 7 (0)  | 0.2 (-0.992908) | 87.5         |
| 14         | 2.44 (-1)          | 7 (0)  | 0.3 (-0.985816) | 89.0         |
| 15         | 2.44 (-1)          | 7 (0)  | 0.7 (-0.971631) | 90.3         |
| 16         | 2.44 (-1)          | 7 (0)  | 1.2 (-0.950355) | 91.2         |
| 17         | 2.44 (-1)          | 7 (0)  | 1.7 (-0.929078) | 91.9         |
| 18         | 2.44 (-1)          | 7 (0)  | 2.2 (-0.907801) | 91.5         |
| 19         | 2.44 (-1)          | 7 (0)  | 2.7 (-0.886525) | 90.8         |
| 20         | 2.44 (-1)          | 7 (0)  | 3.2 (-0.865248) | 91.7         |
| 21         | 2.44 (-1)          | 7 (0)  | 0 (-1)          | 0.0          |
| 22         | 2.44 (-1)          | 10 (1) | 1 (-0.957447)   | 129.4        |
| 23         | 2.44 (-1)          | 10 (1) | 2 (-0.914894)   | 154.2        |
| 24         | 2.44 (-1)          | 10 (1) | 3 (-0.872340)   | 162.1        |
| 25         | 2.44 (-1)          | 10 (1) | 4 (-0.829787)   | 141.8        |
| 26         | 2.44 (-1)          | 10 (1) | 5 (-0.787234)   | 137.3        |
| 27         | 2.44 (-1)          | 10 (1) | 6 (-0.744681)   | 135.0        |
| 28         | 2.44 (-1)          | 10 (1) | 7 (-0.702128)   | 142.9        |
| 29         | 2.44 (-1)          | 10 (1) | 24 (0.021277)   | 148.6        |
| 30         | 2.44 (-1)          | 10 (1) | 47 (1)          | 184.7        |
| 31         | 4.76 (-0.298)      | 4 (-1) | 0 (-1)          | 0.0          |
| 32         | 4.76 (-0.298)      | 4 (-1) | 1 (-0.957447)   | 73.0         |
| 33         | 4.76 (-0.298)      | 4 (-1) | 2 (-0.914894)   | 74.3         |
| 34         | 4.76 (-0.298)      | 4 (-1) | 3 (-0.872340)   | 88.5         |
| 35         | 4.76 (-0.298)      | 4 (-1) | 4 (-0.829787)   | 102.0        |
| 36         | 4.76 (-0.298)      | 4 (-1) | 5 (-0.787234)   | 112.2        |
| 37         | 4.76 (-0.298)      | 4 (-1) | 6 (-0.744681)   | 175.0        |
| 38         | 4.76 (-0.298)      | 4 (-1) | 7 (-0.702128)   | 88.5         |
| 39         | 4.76 (-0.298)      | 4 (-1) | 24 (0.021277)   | 107.4        |
| 40         | 4.76 (-0.298)      | 4 (-1) | 47 (1)          | 86.5         |
| 41         | 4.76 (-0.298)      | 7 (0)  | 0 (-1)          | 0.0          |
| 42         | 4.76 (-0.298)      | 7 (0)  | 0.1 (-0.996454) | 57.3         |
| 43         | 4.76 (-0.298)      | 7 (0)  | 0.2 (-0.992908) | 75.6         |

|    |               |        |                 |       |
|----|---------------|--------|-----------------|-------|
| 44 | 4.76 (-0.298) | 7 (0)  | 0.3 (-0.985816) | 81.4  |
| 45 | 4.76 (-0.298) | 7 (0)  | 0.7 (-0.971631) | 81.8  |
| 46 | 4.76 (-0.298) | 7 (0)  | 1.2 (-0.950355) | 81.2  |
| 47 | 4.76 (-0.298) | 7 (0)  | 1.7 (-0.929078) | 82.4  |
| 48 | 4.76 (-0.298) | 7 (0)  | 2.2 (-0.907801) | 82.0  |
| 49 | 4.76 (-0.298) | 7 (0)  | 2.7 (-0.886525) | 82.0  |
| 50 | 4.76 (-0.298) | 7 (0)  | 3.2 (-0.865248) | 81.8  |
| 51 | 4.76 (-0.298) | 10 (1) | 0 (-1)          | 0.0   |
| 52 | 4.76 (-0.298) | 10 (1) | 1 (-0.957447)   | 140.9 |
| 53 | 4.76 (-0.298) | 10 (1) | 2 (-0.914894)   | 142.3 |
| 54 | 4.76 (-0.298) | 10 (1) | 3 (-0.872340)   | 206.0 |
| 55 | 4.76 (-0.298) | 10 (1) | 4 (-0.829787)   | 217.4 |
| 56 | 4.76 (-0.298) | 10 (1) | 5 (-0.787234)   | 225.5 |
| 57 | 4.76 (-0.298) | 10 (1) | 6 (-0.744681)   | 151.7 |
| 58 | 4.76 (-0.298) | 10 (1) | 7 (-0.702128)   | 281.9 |
| 59 | 4.76 (-0.298) | 10 (1) | 24 (0.021277)   | 228.9 |
| 60 | 4.76 (-0.298) | 10 (1) | 47 (1)          | 224.2 |
| 61 | 9.1 (1)       | 4 (-1) | 0 (-1)          | 0.0   |
| 62 | 9.1 (1)       | 4 (-1) | 1 (-0.957447)   | 131.8 |
| 63 | 9.1 (1)       | 4 (-1) | 2 (-0.914894)   | 193.2 |
| 64 | 9.1 (1)       | 4 (-1) | 3 (-0.872340)   | 153.4 |
| 65 | 9.1 (1)       | 4 (-1) | 4 (-0.829787)   | 164.9 |
| 66 | 9.1 (1)       | 4 (-1) | 5 (-0.787234)   | 170.3 |
| 67 | 9.1 (1)       | 4 (-1) | 6 (-0.744681)   | 175.0 |
| 68 | 9.1 (1)       | 4 (-1) | 7 (-0.702128)   | 123.0 |
| 69 | 9.1 (1)       | 4 (-1) | 24 (0.021277)   | 145.3 |
| 70 | 9.1 (1)       | 4 (-1) | 47 (1)          | 128.4 |
| 71 | 9.1 (1)       | 7 (0)  | 0 (-1)          | 0.0   |
| 72 | 9.1 (1)       | 7 (0)  | 0.1 (-0.996454) | 64.9  |
| 73 | 9.1 (1)       | 7 (0)  | 0.2 (-0.992908) | 74.4  |
| 74 | 9.1 (1)       | 7 (0)  | 0.3 (-0.985816) | 73.4  |
| 75 | 9.1 (1)       | 7 (0)  | 0.7 (-0.971631) | 76.1  |
| 76 | 9.1 (1)       | 7 (0)  | 1.2 (-0.950355) | 76.4  |
| 77 | 9.1 (1)       | 7 (0)  | 1.7 (-0.929078) | 76.1  |
| 78 | 9.1 (1)       | 7 (0)  | 2.2 (-0.907801) | 74.6  |
| 79 | 9.1 (1)       | 7 (0)  | 2.7 (-0.886525) | 75.9  |
| 80 | 9.1 (1)       | 7 (0)  | 3.2 (-0.865248) | 75.7  |
| 81 | 9.1 (1)       | 10 (1) | 0 (-1)          | 0.0   |
| 82 | 9.1 (1)       | 10 (1) | 1 (-0.957447)   | 256.8 |
| 83 | 9.1 (1)       | 10 (1) | 2 (-0.914894)   | 301.4 |
| 84 | 9.1 (1)       | 10 (1) | 3 (-0.872340)   | 175.5 |
| 85 | 9.1 (1)       | 10 (1) | 4 (-0.829787)   | 182.0 |
| 86 | 9.1 (1)       | 10 (1) | 5 (-0.787234)   | 178.4 |
| 87 | 9.1 (1)       | 10 (1) | 6 (-0.744681)   | 228.1 |
| 88 | 9.1 (1)       | 10 (1) | 7 (-0.702128)   | 219.4 |
| 89 | 9.1 (1)       | 10 (1) | 24 (0.021277)   | 223.0 |
| 90 | 9.1 (1)       | 10 (1) | 47 (1)          | 275.5 |
